# Supplementary material for: Low Luteal Serum Progesterone Levels Are Associated With Lower Ongoing Pregnancy and Live Birth Rates in ART: Systematic Review and Meta-Analyses
Source: PubMed Central journal article supplement (PMC9229589; doi:10.3389/fendo.2022.892753), 2022-06-10

# Supplemental Figure 2: Forest plot of studies “one or few corpora lutea” according to the transfer type for live birth.

Risks of bias legend: A, confounding; B, selection of participants; C, classification of intervention; D, deviations from intervention; E, missing data; F, measurement of outcome; G, selection of reported results.

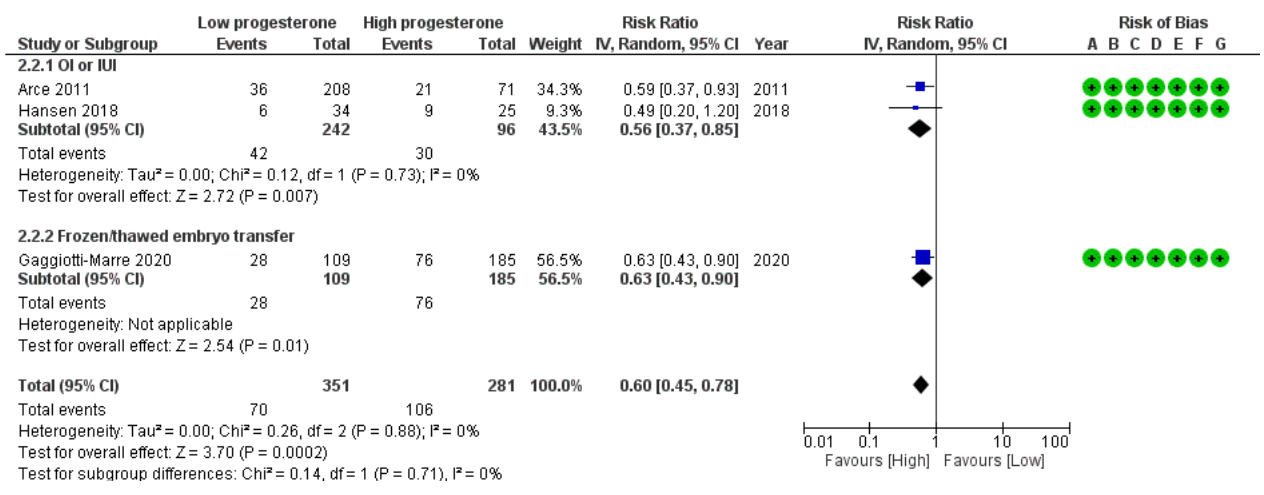

Supplement: Image_2.pdf [file Image_2.pdf]
