# Supplementary material for: Low Luteal Serum Progesterone Levels Are Associated With Lower Ongoing Pregnancy and Live Birth Rates in ART: Systematic Review and Meta-Analyses
Source: PubMed Central journal article supplement (PMC9229589; doi:10.3389/fendo.2022.892753), 2022-06-10

### Supplemental Figure 4: Risk of bias graph

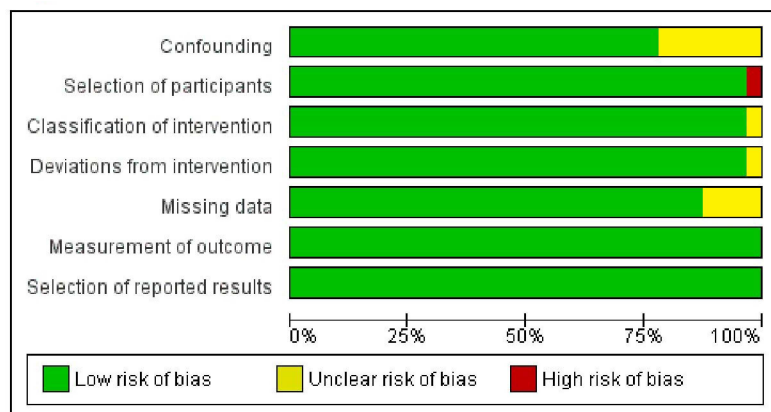

Supplement: Image_4.pdf [file Image_4.pdf]
