# Supplementary material for: Low Luteal Serum Progesterone Levels Are Associated With Lower Ongoing Pregnancy and Live Birth Rates in ART: Systematic Review and Meta-Analyses
Source: PubMed Central journal article supplement (PMC9229589; doi:10.3389/fendo.2022.892753), 2022-06-10
Supplement: Table_2.pdf [file Table_2.pdf]

**Supplemental Table 2: GRADE tables for (A) « No corpus luteum », (B) « One or few corpora lutea » and (C) « Several corpora lutea »**

| <b>(A)</b>               | <b>Risk of bias</b> | <b>Inconsistency</b> | <b>Indirectness</b> | <b>Imprecision</b> | <b>Publication bias</b> | <b>Certainty of evidence (GRADE)</b> |
|--------------------------|---------------------|----------------------|---------------------|--------------------|-------------------------|--------------------------------------|
| <b>Ongoing pregnancy</b> | Low                 | High                 | Moderate            | High               | Moderate                | ⊕⊕                                   |
| <b>Live birth</b>        | Low                 | Moderate             | High                | High               | Moderate                | ⊕⊕                                   |
| <b>Miscarriage</b>       | Low                 | Low                  | High                | High               | Low                     | ⊕⊕                                   |

  

| <b>(B)</b>        | <b>Risk of bias</b> | <b>Inconsistency</b> | <b>Indirectness</b> | <b>Imprecision</b> | <b>Publication bias</b> | <b>Certainty of evidence (GRADE)</b> |
|-------------------|---------------------|----------------------|---------------------|--------------------|-------------------------|--------------------------------------|
| <b>Live birth</b> | Low                 | Moderate             | Low                 | Low                | Low                     | ⊕⊕                                   |

  

| <b>(C)</b>               | <b>Risk of bias</b> | <b>Inconsistency</b> | <b>Indirectness</b> | <b>Imprecision</b> | <b>Publication bias</b> | <b>Certainty of evidence (GRADE)</b> |
|--------------------------|---------------------|----------------------|---------------------|--------------------|-------------------------|--------------------------------------|
| <b>Ongoing pregnancy</b> | Low                 | Moderate             | Very low            | Moderate           | Very low                | ⊕                                    |
| <b>Live birth</b>        | Low                 | Moderate             | Very low            | Moderate           | Very low                | ⊕                                    |
